# Supplementary material for: Proof-of-Concept Study of Drug Brain Permeability Between in Vivo Human Brain and an in Vitro iPSCs-Human Blood-Brain Barrier Model
Source: PubMed Central journal article supplement (PMC6831611; doi:10.1038/s41598-019-52213-6), 2019-11-05
Supplement: 41598_2019_52213_MOESM1_ESM.pdf [file 41598_2019_52213_MOESM1_ESM.pdf]

## SUPPLEMENTAL INFORMATIONS

### **Proof-of-Concept Study of Drug Brain Permeability Between *in Vivo* Human Brain and an *in Vitro* iPSCs-Human Blood-Brain Barrier Model.**

Gwenaëlle Le Roux<sup>1</sup>, Rafika Jarray<sup>2,3</sup>, Anne-Cécile Guyot<sup>1</sup>, Serena Pavoni<sup>2</sup>, Narciso Costa<sup>1</sup>, Frédéric Théodoro<sup>4</sup>, Ferid Nassor<sup>2,3</sup>, Alain Pruvost<sup>4</sup>, Nicolas Tournier<sup>5</sup>, Yulia Kiyan<sup>6</sup>, Oliver Langer<sup>7</sup>, Frank Yates<sup>2,3</sup>, Jean Philippe Deslys<sup>2</sup>, Aloïse Mabondzo<sup>1\*</sup>

<sup>1</sup>Service de Pharmacologie et d'Immunoanalyse, CEA, Université Paris-Saclay, F-91191 Gif-sur-Yvette, France.

<sup>2</sup>Service d'Etude des Prions et des Infections Atypiques, CEA, F-92265 Fontenay-aux-Roses, France.

<sup>3</sup>Sup'Biotech, F-94800 Villejuif, France.

<sup>4</sup>Service de Pharmacologie et d'Immunoanalyse (SPI), Plateforme Smart-MS, CEA, INRA, Université Paris-Saclay, F-91191 Gif-sur-Yvette, France.

<sup>5</sup>UMR 1023 IMIV, Service Hospitalier Frédéric Joliot, CEA, Inserm, Univ. Paris Sud, CNRS, Université Paris-Saclay, Orsay, France.

<sup>6</sup>Medizinische Hochschule Hannover, DE-30625 Hannover, Germany.

<sup>7</sup>Department of Clinical Pharmacology, Medical University of Vienna, A-1090 Vienna, Austria and Preclinical Molecular Imaging, AIT Austrian Institute of Technology GmbH, A-2444 Seibersdorf, Austria.

**S1-Table 1.** Rate constant for transfer from arterial plasma into brain obtained from compartmental modelling of PET data

| <b>Clinical PET radioligands</b> | <b>K1 (mL.cm<sup>-3</sup>.min<sup>-1</sup>)</b> | <b>References</b> |
|----------------------------------|-------------------------------------------------|-------------------|
| <b>Befloxatone</b>               | 0.20                                            | unpublished data  |
| <b>Fluoro-A85380</b>             | 0.11                                            | 33                |
| <b>Flumazenil</b>                | 0.35                                            | 34                |
| <b>Raclopride</b>                | 0.09                                            | 35                |
| <b>Loperamide</b>                | 0.002                                           | 27                |
| <b>verapamil</b>                 | 0.04                                            | 36                |
| <b>Erlotinib</b>                 | 0.02                                            | 37                |
| <b>Buprenorphine</b>             | 0.17                                            | Unpublished data  |

**S2-Table 2.** Primer sequences used for semi-quantitative PCR analysis

| <b>Primer name</b>   | <b>Primer sequence (5'&gt;3')</b> |
|----------------------|-----------------------------------|
| <b>OCT4_forward</b>  | AGCGAACCAGTATCGAGAAC              |
| <b>OCT4_reverse</b>  | TTACAGAACCACACTCGGAC              |
| <b>SOX2_forward</b>  | AGCTACAGC ATGATGCAGGA             |
| <b>SOX2_reverse</b>  | GGTCATGGAGTTGTA CTGCA             |
| <b>REX1_forward</b>  | CAGTCCAGCAGGTGTTTGC               |
| <b>REX1_reverse</b>  | GCATTCTATGTAACAGTCTGAGA           |
| <b>NANOG_forward</b> | TGAA CCTCAGCTACAAACAG             |
| <b>NANOG_reverse</b> | TGGTGGTAGGAAGAGTAAAG              |
| <b>RPLPO_forward</b> | CATTGCCCATGTGAAGTC                |

**S3-Table 3.** References and working dilutions of antibodies used for immunofluorescence and flow cytometry experiments.

| Targeted antigen                          | Antibody description         | References / supplier              | Final concentration for IF or Flow cytometry |
|-------------------------------------------|------------------------------|------------------------------------|----------------------------------------------|
| ZO-1 (Clone ZMD.437)                      | Rabbit polyclonal anti-human | 40-2300 / Thermo Fisher Scientific | 5 µg/ml (IF)                                 |
| Claudin-5 (Clone 4C3C2)                   | Mouse monoclonal anti-human  | 35 250 / ZYMED                     | 10 µg/ml (IF)                                |
| Anti-mouse Alexa Fluor 488                | Polyclonal Goat anti-mouse   | A-11029 / Thermo Fisher Scientific | 5 µg/ml (IF)                                 |
| Anti-rabbit Alexa Fluor 594               | Polyclonal Goat anti-rabbit  | A-11037 / Thermo Fisher Scientific | 5 µg/ml (IF)                                 |
| SSEA4 (clone eBioMC-813-70)               | Monoclonal Mouse anti-human  | 12-8843-42 / eBioscience           | 20 µg/ml (Flow cytometry)                    |
| PE Mouse IgG3 Isotype Control (Clone B10) | Mouse IgG3                   | 12-4742-42 / eBioscience           | 20 µg/ml (Flow cytometry)                    |
| TRA1-60 PE (Clone TRA1-60)                | Monoclonal Mouse anti-human  | 12-8863-42 / eBioscience           | 20 µg/ml (Flow cytometry)                    |

S4-Table 4. Primer sequences used for RT-Q-PCR analysis

| Primer name          | Primer sequence (5'->3') |
|----------------------|--------------------------|
| hCAV1_forward        | AGTTGCTGCAAACCTGACC      |
| hCAV1_reverse        | CTCCTCCCCCATCTTCTTTC     |
| hCAV2_forward        | CAGTGCAGACAATATGGAAGAG   |
| hCAV2_reverse        | GGAAATGAACAGAACAGTGGTG   |
| hβ-catenin_forward   | TCTTACACCCACCATCCCAC     |
| hβ-catenin_reverse   | GCACGAACAAGCAACTGAAC     |
| hEndothelin1-forward | CTCCTGCTCGTCCCTGATG      |
| hEndothelin1-reverse | CGGTCTGTTGCCTTTGTGG      |
| hTFRC_forward        | TCCCTTCCTTCAATCACACTC    |
| hTFRC_reverse        | TCTTTCAGCACATTGCTCAC     |
| hINSR-forward        | TG TTCATCCTCTGATTCTCTG   |
| hINSR-reverse        | GCTTAGATGTTCCCAAAGTC     |
| hbEGF-forward        | TGACCACACAACCATCCTG      |
| hbEGF-reverse        | TCCACATCATAACCTCCTCTC    |
| hPgp-forward         | TGAATCTGGAGGAAGACATGAC   |
| hPgp-reverse         | CCAGGCACCAAATGAAACC      |
| hMRP1-forward        | AATAGAAGTGTGGGCTGAG      |
| hMRP1-reverse        | CGAGACACCTTAAAGAACAG     |
| hBCRP1-forward       | TGCCCAGGACTCAATGCAAC     |
| hBCRP1-reverse       | ACGTGATTCTCCACAAGCCC     |
| hLRP1-forward        | TGCTACTGCAACAGCAGCTTTC   |
| hLRP1-reverse        | TGCCGTACTGAGCACTCATC     |

|                       |                          |
|-----------------------|--------------------------|
| <b>hZO1-forward</b>   | TGATCATTCCAGGCACTCG      |
| <b>hZO1-reverse</b>   | CTCTTCATCTCTACTCCGGAGACT |
| <b>hCD31-forward</b>  | GAGTATTACTGCACAGCCTTCA   |
| <b>hCD31-reverse</b>  | AACCACTGCAATAAGTCCTTTC   |
| <b>hGAPDH-forward</b> | TCAAGAAGGTGGTGAAGCAGGC   |
| <b>hGAPDH-reverse</b> | AGTGGGTGTCGCTGTTGAAGTC   |

## References

33. Gallezot, JD. *et al.* In vivo imaging of human cerebral nicotinic acetylcholine receptors with 2-18F-fluoro-A-85380 and PET. *J Nucl Med.* **46**, 240-247 (2005).
34. Delforge, J. *et al.* Quantification of benzodiazepine receptors in human brain using PET, [<sup>11</sup>C]flumazenil, and a single-experiment protocol. *J Cereb Blood Flow Metab.* **15**, 284-300 (1995).
35. Pappata, S. *et al.* In vivo detection of striatal dopamine release during reward: a PET study with [<sup>11</sup>C]raclopride and a single dynamic scan approach. *Neuroimage* **16**, 1015-1027 (2002).
36. Bauer, M. *et al.* Approaching complete inhibition of P-glycoprotein at the human blood-brain barrier: an (R)-[<sup>11</sup>C]verapamil PET study. *J Cereb Blood Flow Metab.* **35**, 743-746 (2015).
37. Bauer, M. *et al.* A Proof-of-Concept Study to Inhibit ABCG2- and ABCB1-Mediated Efflux Transport at the Human Blood-Brain Barrier. *J Nucl Med.* **60**, 486-491 (2019).
